# Supplementary material
Source: MDPI journal article supplement (https://www.mdpi.com/1424-2818/15/2/208)
Supplement: s1 [file s1]

Supplementary Materials

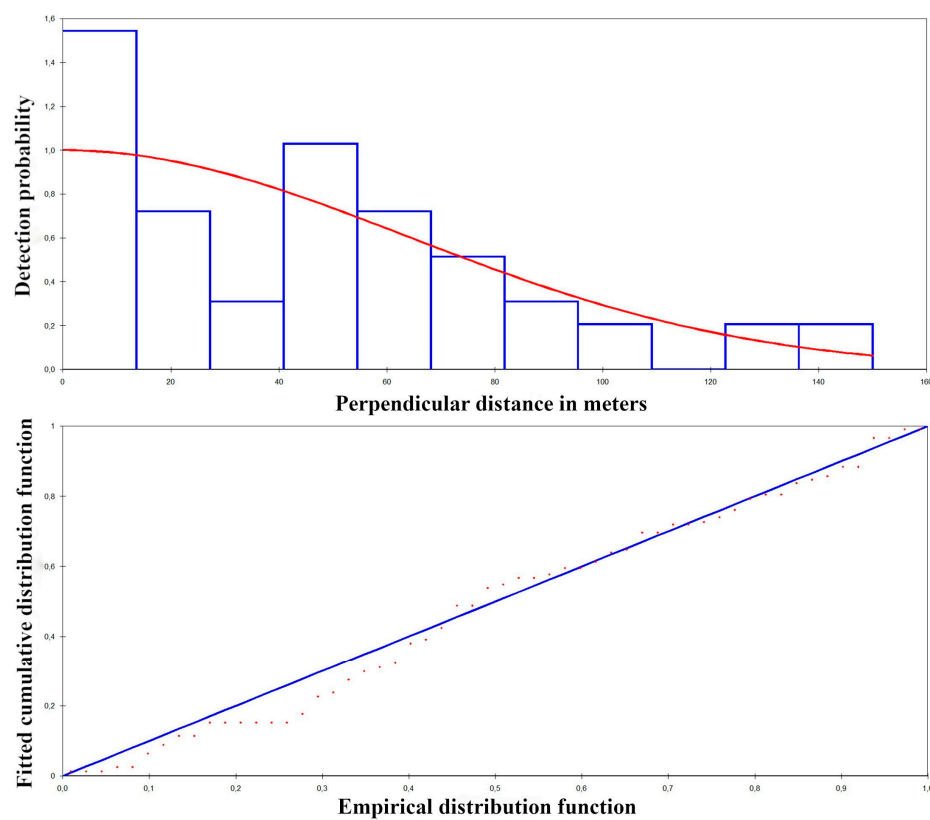

**Figure S1.** Detection function (above) and Q-Q plot (below) relative to a CDS half-normal analysis performed with a distance of truncation ( $w$ ) of 150 m for the species *Eumomota superciliosa*. See Table S1 for GoF tests and compare to final modes (see Figures S3 and S4)

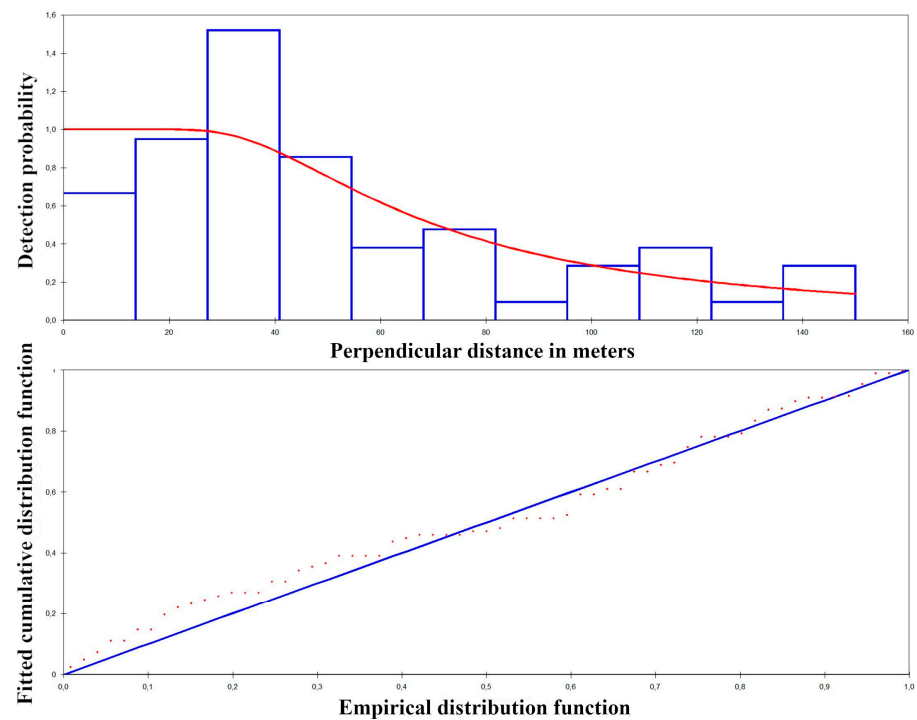

**Figure S2.** Detection function (above) and Q-Q plot (below) relative to a CDS hazard rate analysis performed with a distance of truncation ( $w$ ) of 150 m for the species *Momotus lessonii*. See Table S1 for GoF tests and compare to final

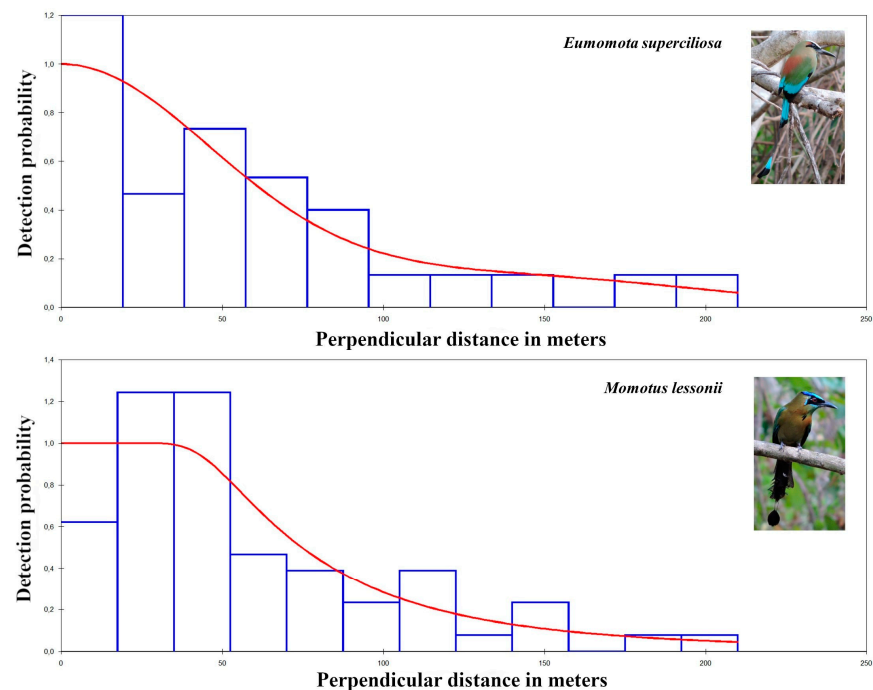

**Figure S3.** Detection functions of the selected analyses (analyses 1 and 5 in Table 1), based on the curve's goodness of fit (GoF) on the histogram (see section 2. Materials and Methods), computed separately for each species.

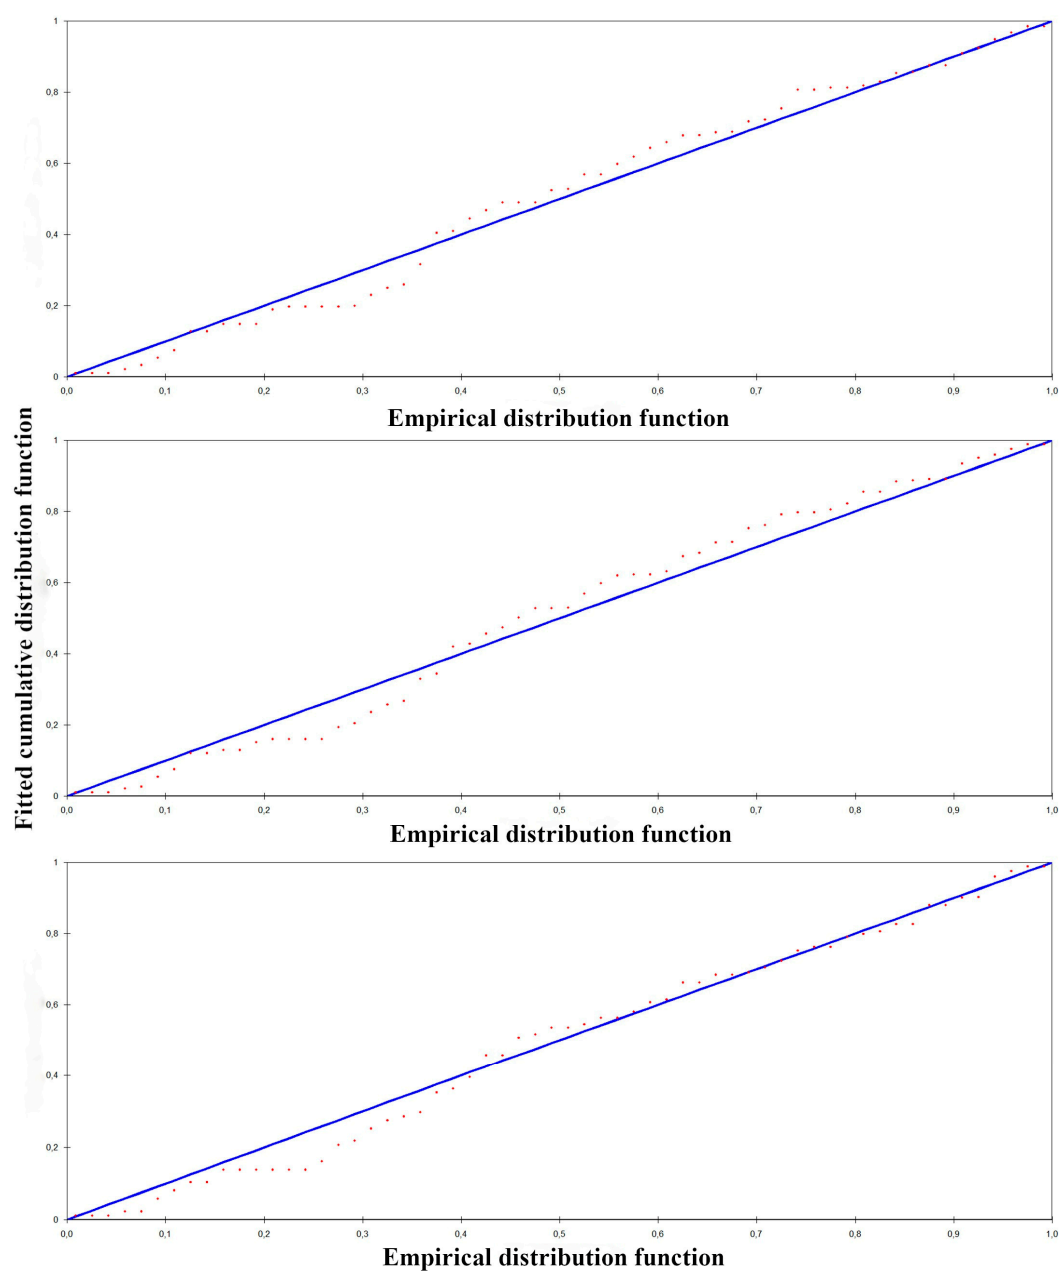

**Figure S4.** Q-Q plots of models reported in Table 1 for *Eumomota superciliosa*. From the top to the bottom are shown plots corresponding to analysis numbers 1, 2 and 3.

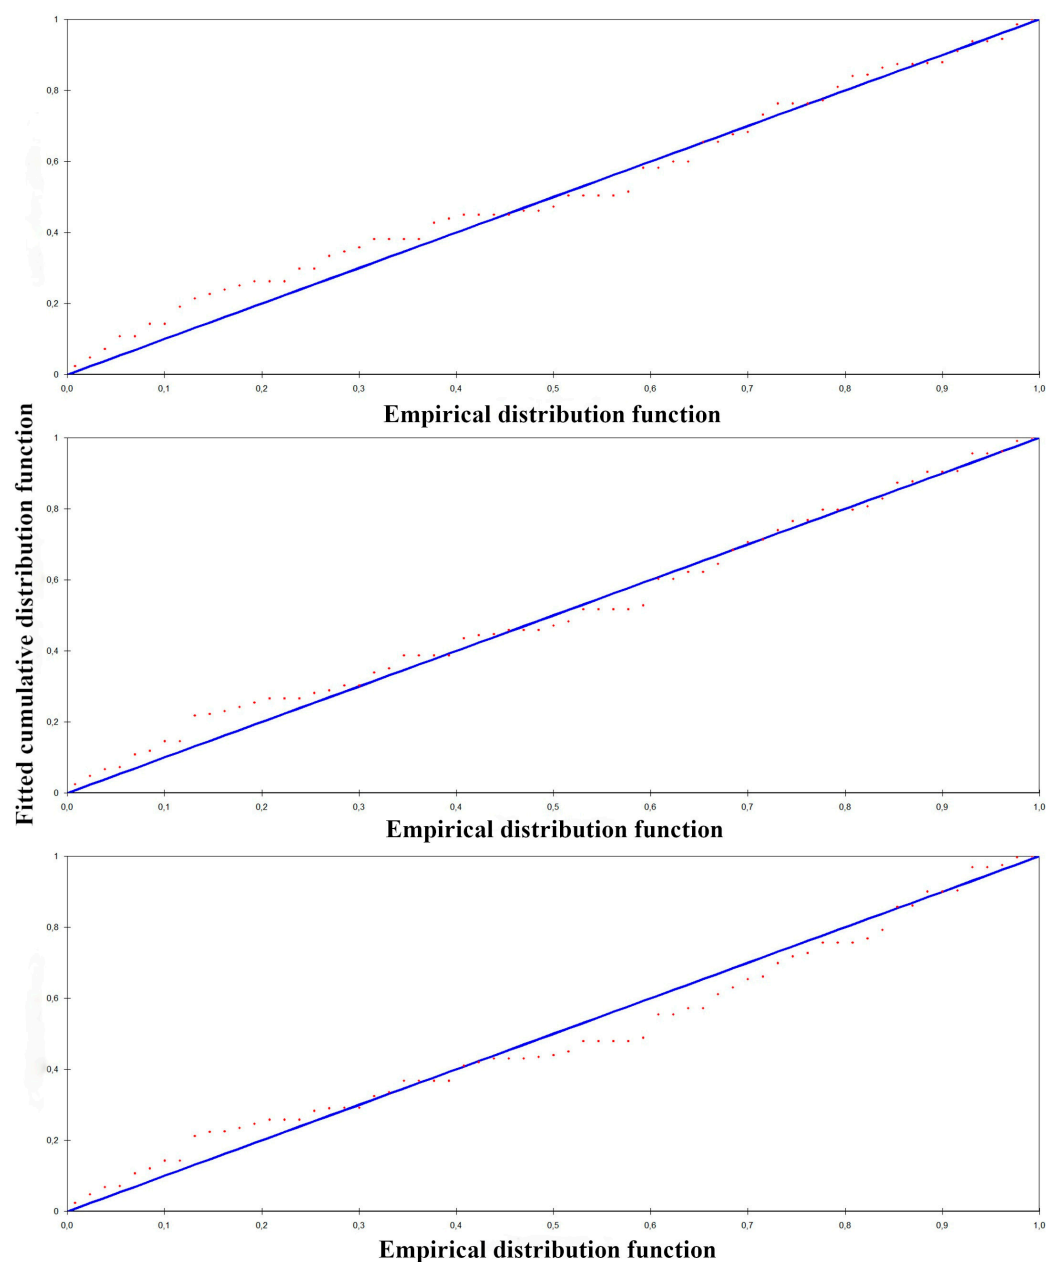

**Figure S5.** Q-Q plots of models reported in Table 1 for *Momotus lessonii*. From the top to the bottom are shown plots corresponding to analysis numbers 4, 5 and 6.

**Table S1.** Summary of the results of two illustrative analyses run at a distance of truncation ( $w$ ) of 150 m for comparison with the selected models (see Table 1). Distances around 150 m were the most inspected for the selection of an appropriate  $w$ , but some obvious discrepancies made us reject them, notably in the goodness of fit (e.g., see  $p(\chi^2)$  values and see Figures S1 and S2) and rather high percentages of non-considered contacts (8.7% and 15.2% for *M. lessonii* and *E. superciliosa*, respectively).

| SPECIES                | ANALYSIS | MODEL       | k | w   | n  | KSt<br>GoF | CvMt | GoF             | p( $\chi^2$ ) | p    | ESW   | D $\pm$ SE       | %CV   | 95% CI      |
|------------------------|----------|-------------|---|-----|----|------------|------|-----------------|---------------|------|-------|------------------|-------|-------------|
| <i>E. superciliosa</i> | CDS      | Half Normal | 1 | 150 | 56 | 0.44       | 0.60 | < p $\leq$ 0.70 | 0.18          | 0.52 | 78.56 | 20.66 $\pm$ 4.80 | 23.24 | 12.62-33.83 |
| <i>M. lessonii</i>     | CDS      | Hazard Rate | 2 | 150 | 63 | 0.64       | 0.50 | < p $\leq$ 0.60 | 0.22          | 0.54 | 81.61 | 22.38 $\pm$ 6.68 | 29.83 | 12.14-41.24 |
